# Supplementary material
Source: PubMed Central journal article supplement (PMC5038013)
Supplement: JB.00347-16_zjb999094194so1.pdf [file JB.00347-16_zjb999094194so1.pdf]

Supplemental Table 1. Strain information and LOS typing results

| Isolate ID | Alias    | Source  | Year | Country     | MLST |     | PCR |   |   |   |   |   |   |   |   |    |    |    | LOS locus class | RAST accession number for whole genome sequence in "guest" account | EMBL accession number |
|------------|----------|---------|------|-------------|------|-----|-----|---|---|---|---|---|---|---|---|----|----|----|-----------------|--------------------------------------------------------------------|-----------------------|
|            |          |         |      |             | ST   | CC  | 1   | 2 | 3 | 4 | 5 | 6 | 7 | 8 | 9 | 10 | 11 | 12 |                 |                                                                    |                       |
| 1          | FB457    | Human   | 1997 | Finland     |      |     | 18  | - | - | - | - | - | - | - | - | +  | -  | -  | VIII            |                                                                    |                       |
| 2          | FB3428   | Human   | 1997 | Finland     |      |     | 18  | - | - | + | - | + | - | - | - | +  | -  | -  | untypable       |                                                                    |                       |
| 3          | FB3508   | Human   | 1997 | Finland     |      |     | 18  | - | - | - | - | - | - | - | - | +  | -  | -  | VIII            |                                                                    |                       |
| 4          | FB3429   | Human   | 1997 | Finland     | 825  | 828 | 18  | - | - | - | - | - | - | - | - | +  | -  | -  | VIII            | 195.117                                                            |                       |
| 5          | FB4856   | Human   | 1997 | Finland     |      |     |     | - | - | + | - | + | + | + | + | -  | -  | -  | untypable       |                                                                    |                       |
| 6          | FB5755   | Human   | 1997 | Finland     | 1563 | 828 | 10  | - | + | + | - | - | - | - | - | -  | -  | -  | II              | 195.118                                                            |                       |
| 7          | FB6937   | Human   |      |             |      |     | 8   | - | - | + | + | - | - | - | - | -  | -  | -  | untypable       |                                                                    |                       |
| 12         | FB8983   | Human   | 1997 | Finland     | 1628 | 828 | 10  | - | + | + | - | - | - | - | - | -  | -  | -  | II              | 195.91                                                             |                       |
| 13         | FB8984   | Human   | 1997 | Finland     | 1628 | 828 | 10  | - | + | + | - | - | - | - | - | -  | -  | -  | II              | 195.113                                                            |                       |
| 14         | FB9468   | Human   | 1997 | Finland     |      |     | 13  | - | - | + | - | + | - | - | + | -  | -  | -  | IV              |                                                                    |                       |
| 16         | FB10883  | Human   |      |             |      |     | 7   | - | - | - | + | - | - | - | - | -  | -  | -  | III             |                                                                    |                       |
| 29         | CNET019  | Poultry |      | Netherlands |      |     | 6   | - | - | + | - | + | - | - | - | -  | -  | -  | untypable       |                                                                    |                       |
| 30         | CNET020  | Poultry |      | Netherlands |      |     | 6   | - | - | - | - | - | - | - | - | -  | -  | -  | untypable       |                                                                    |                       |
| 31         | CNET021  | Poultry |      | Netherlands | 901  | 828 | 7   | - | - | - | - | - | - | - | - | -  | -  | -  | untypable       | 195.116                                                            |                       |
| 32         | CNET051  | Human   |      | France      | 838  | 828 | 13  | - | - | + | - | + | + | - | + | -  | -  | -  | IV              |                                                                    |                       |
| 33         | CNET061  | Poultry |      | Netherlands |      |     | 18  | - | - | - | - | - | - | - | - | +  | -  | -  | VIII            |                                                                    |                       |
| 34         | CNET062  | Poultry |      | Netherlands | 2183 | 828 | 7   | + | - | - | - | - | - | - | - | -  | -  | -  | I               | 195.107                                                            |                       |
| 36         | CNET067  | Pig     |      | Netherlands | 1016 | 828 | 10  | - | + | + | - | - | - | - | - | -  | -  | -  | II              | 195.119                                                            |                       |
| 37         | CNET069  | Pig     |      | UK          | 1240 | UA  | 13  | - | - | + | - | + | + | - | + | -  | -  | -  | IV              |                                                                    |                       |
| 38         | CNET071  | Pig     |      | Denmark     | 1826 | 828 | 18  | - | - | - | - | - | - | - | - | +  | -  | -  | VIII            | 195.112                                                            |                       |
| 39         | CNET072  | Pig     |      | Denmark     | 1153 | 828 | 10  | - | + | + | - | - | - | - | - | -  | -  | -  | II              | 195.102                                                            |                       |
| 41         | CNET082  | Poultry |      | UK          | 825  | 828 | 18  | - | - | - | - | - | - | - | - | +  | -  | -  | VIII            | 195.103                                                            |                       |
| 44         | FB713    | Human   | 1996 | Finland     | 1156 | 828 | 15  | - | - | + | - | + | + | + | - | -  | -  | -  | VII             |                                                                    |                       |
| 45         | FB6470   | Human   | 1996 | Finland     | 1946 | 828 | 11  | - | - | - | - | - | - | - | - | -  | -  | +  | X               | 195.106                                                            |                       |
| 47         | T-72385  | Human   | 2002 | Finland     | 1957 | 828 | 7   | - | - | - | + | - | - | - | - | -  | -  | -  | III             |                                                                    |                       |
| 49         | 76315    | Human   | 2006 | India       |      |     | 7   | + | - | - | - | - | - | - | - | -  | -  | -  | I               |                                                                    |                       |
| 50         | 76326    | Human   | 2006 | Romania     | 825  | 828 | 18  | - | - | - | - | - | - | - | - | +  | -  | -  | VIII            | 195.110                                                            |                       |
| 51         | 76339    | Human   | 2006 | Finland     | 5088 | UA  | 7   | - | - | - | - | - | - | - | - | -  | +  | -  | IX              |                                                                    | HG326877              |
| 53         | 76347    | Human   | 2006 | Turkey      |      |     | 7   | - | - | - | - | - | - | - | - | -  | -  | -  | untypable       |                                                                    |                       |
| 54         | 76348    | Human   | 2006 | Spain       |      |     | 7   | + | - | - | - | - | - | - | - | -  | -  | -  | I               |                                                                    |                       |
| 55         | 76361    | Human   | 2006 | Spain       | 854  | 828 | 10  | - | + | + | - | - | - | - | - | -  | -  | -  | II              | 195.115                                                            |                       |
| 56         | 76363    | Human   | 2006 | France      |      |     | 12  | + | - | + | - | + | + | - | + | -  | -  | -  | untypable       |                                                                    |                       |
| 58         | 76385    | Human   | 2006 | Finland     | 1614 | 828 | 7   | - | - | - | + | - | - | - | - | -  | -  | -  | III             |                                                                    |                       |
| 59         | 76398    | Human   | 2006 | Bulgaria    |      |     | 18  | - | - | - | - | - | - | - | - | +  | -  | -  | VIII            |                                                                    |                       |
| 60         | 76412    | Human   | 2006 | Bulgaria    | 6321 | 828 | 10  | - | + | + | - | - | - | - | - | -  | -  | -  | II              | 195.101                                                            |                       |
| 61         | 76466    | Human   | 2006 | Finland     | 854  | 828 | 13  | - | - | + | - | + | + | - | + | -  | -  | -  | IV              |                                                                    |                       |
| 62         | 76656    | Human   | 2006 | Finland     | 1965 | 828 | 11  | - | - | - | - | - | - | - | - | -  | -  | +  | X               |                                                                    |                       |
| 63         | T-73692  | Human   | 2003 | Finland     | 2725 | 828 | 11  | - | - | - | - | - | - | - | - | -  | -  | +  | X               | 195.105                                                            |                       |
| 64         | T-73805  | Human   | 2003 | Finland     | 1968 | UA  | 7   | - | - | - | + | - | - | - | - | -  | -  | -  | III             |                                                                    |                       |
| 65         | T-73864  | Human   | 2003 | Finland     | 1585 | 828 | 10  | - | + | + | - | - | - | - | - | -  | -  | -  | II              | 195.97                                                             |                       |
| 66         | 8045     | Human   |      | Finland     |      |     | 18  | - | - | - | - | - | - | - | - | +  | -  | -  | VIII            |                                                                    |                       |
| 67         | 03VV415  | Human   |      | Finland     | 5672 | 828 | 10  | - | + | + | - | - | - | - | - | -  | -  | -  | II              |                                                                    |                       |
| 68         | 03VV2801 | Human   |      | Finland     |      |     | 18  | - | - | - | - | - | - | - | - | +  | -  | -  | VIII            |                                                                    |                       |
| 70         | HKY6592  | Poultry | 2003 | Finland     | 854  | 828 | 13  | - | - | + | - | + | - | - | + | -  | -  | -  | IV              |                                                                    |                       |
| 71         | HKY6645  | Poultry | 2004 | Finland     |      |     | 13  | - | - | + | - | + | - | - | + | -  | -  | -  | IV              |                                                                    |                       |
| 72         | HKY6507  | Poultry | 2005 | Finland     | 1413 | 828 | 10  | - | + | + | - | - | - | - | - | -  | -  | -  | II              | 195.96                                                             |                       |
| 73         | 2946     | Poultry | 1999 | Finland     | 1579 | 828 | 10  | - | + | + | - | - | - | - | - | -  | -  | -  | II              | 195.98                                                             |                       |
| 74         | 187_2615 | Poultry | 2006 | Finland     | 1096 | 828 | 10  | - | + | + | - | - | - | - | - | -  | -  | -  | II              | 195.99                                                             |                       |
| 75         | 188_2618 | Poultry | 2006 | Finland     | 854  | 828 | 10  | - | + | + | - | - | - | - | - | -  | -  | -  | II              | 195.100                                                            |                       |
| 76         | 87_1773  | Poultry | 2006 | Finland     | 3455 | 828 | 12  | - | - | + | - | + | + | - | + | -  | -  | -  | untypable       |                                                                    |                       |
| 77         | 85_1771  | Poultry | 2006 | Finland     |      |     | 13  | - | - | + | - | + | - | - | - | -  | -  | -  | VI              |                                                                    |                       |

|     |           |         |      |         |      |     |    |   |   |   |   |   |   |   |   |   |   |   |   |   |           |  |         |
|-----|-----------|---------|------|---------|------|-----|----|---|---|---|---|---|---|---|---|---|---|---|---|---|-----------|--|---------|
| 83  | E1 3140   | Poultry | 2003 | Finland |      |     | 11 | - | - | - | - | - | - | - | - | - | - | - | + | X |           |  |         |
| 84  | E1 3488   | Poultry | 2003 | Finland |      |     | 13 | - | - | + | - | + | - | - | - | - | - | - | - | - | IV        |  |         |
| 85  | E1 3490   | Poultry | 2003 | Finland |      |     | 13 | - | - | + | - | + | - | - | - | - | - | - | - | - | VI        |  |         |
| 86  | E1 5556   | Poultry | 2003 | Finland |      |     | 12 | - | - | + | - | + | + | - | - | - | - | - | - | - | untypable |  |         |
| 87  | 6871      | Human   | 1997 | Finland |      |     | 13 | - | - | + | - | + | - | - | - | - | - | - | - | - | VI        |  |         |
| 94  | S149R     | Pig     | 1997 | Finland |      |     | 13 | - | - | + | - | + | - | - | - | - | - | - | - | - | IV        |  |         |
| 95  | S157R     | Pig     | 1997 | Finland |      |     | 11 | - | - | - | - | - | - | - | - | - | - | - | - | + | X         |  |         |
| 96  | S190R     | Pig     | 1997 | Finland |      |     | 11 | - | - | - | - | - | - | - | - | - | - | - | - | + | X         |  |         |
| 97  | S161Rb    | Pig     | 1997 | Finland |      |     | 11 | - | + | + | - | + | + | - | + | - | - | - | - | + | untypable |  |         |
| 99  | bss/cg/11 | goose   | 2011 | Finland | 6354 | UA  | 11 | - | - | - | - | + | + | - | - | - | - | - | - | - | XII       |  | 195.104 |
| 100 | V34/12    | goose   | 2012 | Finland | 1243 | UA  | 7  | - | - | - | + | - | - | - | - | - | - | - | - | - | III       |  | 195.114 |
| 101 | L80.1     | Pig     |      | Finland |      |     | 13 | - | - | + | - | + | - | - | - | - | - | - | - | - | IV        |  |         |
| 102 | L96.2     | Pig     |      | Finland |      |     | 13 | - | - | + | - | + | - | - | - | - | - | - | - | - | IV        |  |         |
| 103 | L58.2     | Pig     |      | Finland |      |     | 13 | - | - | + | - | + | - | - | - | - | - | - | - | - | IV        |  |         |
| 104 | L18.2     | Pig     |      | Finland |      |     | 10 | - | + | + | - | - | - | - | - | - | - | - | - | - | II        |  |         |
| 105 | L43.2     | Pig     |      | Finland |      |     | 13 | - | - | + | - | + | - | - | - | - | - | - | - | - | IV        |  |         |
| 106 | H99.1     | Pig     |      | Finland |      |     | 12 | - | - | + | - | + | - | - | - | - | - | - | - | - | untypable |  |         |
| 107 | H36.2     | Pig     |      | Finland |      |     | 14 | - | - | + | - | + | + | + | + | - | - | - | - | - | untypable |  |         |
| 108 | H119.1    | Pig     |      | Finland |      |     | 7  | - | - | - | + | - | - | - | - | - | - | - | - | - | III       |  |         |
| 109 | L62.2     | Pig     |      | Finland |      |     | 12 | - | - | + | - | + | + | + | + | - | - | - | - | + | untypable |  |         |
| 110 | H15.2     | Pig     |      | Finland |      |     | 13 | - | - | + | - | + | - | - | - | - | - | - | - | - | IV        |  |         |
| 111 | L61.1     | Pig     |      | Finland |      |     | 13 | - | - | + | - | + | - | - | - | - | - | - | - | - | VI        |  |         |
| 112 | L114.2    | Pig     |      | Finland |      |     | 10 | - | + | + | - | - | - | - | - | - | - | - | - | - | II        |  |         |
| 113 | H101.2    | Pig     |      | Finland |      |     | 7  | - | - | - | + | - | - | - | - | - | - | - | - | - | III       |  |         |
| 114 | L44.2     | Pig     |      | Finland | 2725 | 828 | 11 | - | - | - | - | - | - | - | - | - | - | - | - | + | X         |  | 195.124 |
| 115 | L51.1     | Pig     |      | Finland |      |     | 13 | - | - | + | - | + | - | - | - | - | - | - | - | - | IV        |  |         |
| 116 | E14.3     | Pig     | 2009 | Finland |      |     | 13 | - | - | + | - | + | - | - | - | - | - | - | - | - | VI        |  |         |
| 117 | E23.3     | Pig     | 2009 | Finland |      |     | 11 | - | - | - | - | - | - | - | - | - | - | - | - | + | untypable |  |         |
| 118 | E29.3     | Pig     | 2009 | Finland |      |     | 13 | - | - | + | - | + | - | - | - | - | - | - | - | - | VI        |  |         |
| 119 | E30.3     | Pig     | 2009 | Finland |      |     | 12 | - | - | + | - | + | + | - | - | - | - | - | - | - | untypable |  |         |
| 120 | E33.3     | Pig     | 2009 | Finland |      |     | 13 | - | - | + | - | + | - | - | - | - | - | - | - | - | VI        |  |         |
| 121 | E34.3     | Pig     | 2009 | Finland |      |     | 10 | - | + | + | - | - | - | - | - | - | - | - | - | - | II        |  |         |
| 122 | E7.3      | Pig     | 2009 | Finland |      |     | 13 | - | - | - | - | - | - | - | - | - | - | - | - | + | untypable |  |         |
| 123 | E37.3     | Pig     | 2009 | Finland |      |     | 10 | - | + | + | - | - | - | - | - | - | - | - | - | - | II        |  |         |
| 124 | E42.1     | Pig     | 2009 | Finland | 6575 | 828 | 13 | - | - | + | - | + | - | - | - | - | - | - | - | - | VI        |  | 195.134 |
| 125 | E47.4     | Pig     | 2009 | Finland | 1058 | 828 | 11 | - | - | - | - | - | - | - | - | - | - | - | - | + | X         |  | 195.128 |
| 127 | E52.1     | Pig     | 2009 | Finland |      |     | 13 | - | - | + | - | + | - | - | - | - | - | - | - | - | VI        |  |         |
| 129 | E58.3     | Pig     | 2009 | Finland |      |     | 10 | - | + | + | - | - | - | - | - | - | - | - | - | - | II        |  |         |
| 130 | E61.3     | Pig     | 2009 | Finland |      |     | 13 | - | - | + | - | + | - | - | - | - | - | - | - | - | VI        |  |         |
| 131 | E67.3     | Pig     | 2009 | Finland | 6575 | 828 | 13 | - | - | + | - | + | - | - | - | - | - | - | - | - | VI        |  | 195.133 |
| 132 | E69.3     | Pig     | 2009 | Finland |      |     | 12 | - | - | - | - | - | - | - | - | - | - | - | - | + | X         |  |         |
| 133 | E71.3     | Pig     | 2009 | Finland |      |     | 7  | - | - | - | + | - | - | - | - | - | - | - | - | - | III       |  |         |
| 134 | E75.1     | Pig     | 2009 | Finland |      |     | 12 | - | - | + | - | + | + | - | + | - | - | - | - | - | untypable |  |         |
| 135 | E82.3     | Pig     | 2009 | Finland |      |     | 7  | - | - | - | + | - | - | - | - | - | - | - | - | - | III       |  |         |
| 136 | E89.3     | Pig     | 2009 | Finland |      |     | 13 | - | - | + | - | + | - | - | - | - | - | - | - | - | untypable |  |         |
| 137 | E90.1     | Pig     | 2009 | Finland | 2172 | 828 | 10 | - | + | + | - | - | - | - | - | - | - | - | - | - | II        |  | 195.125 |
| 138 | E107.3    | Pig     | 2009 | Finland | 1145 | 828 | 11 | - | - | - | - | - | + | - | - | - | - | - | - | + | XI        |  | 195.111 |
| 140 | E97.3     | Pig     | 2009 | Finland |      |     | 11 | - | - | - | - | - | - | - | - | - | - | - | - | + | X         |  |         |
| 141 | E116.3    | Pig     | 2009 | Finland |      |     | 13 | - | - | + | - | + | - | - | - | - | - | - | - | - | VI        |  |         |
| 142 | E125.3    | Pig     | 2009 | Finland |      |     | 7  | - | - | - | + | - | - | - | - | - | - | - | - | - | III       |  |         |
| 143 | E128.3    | Pig     | 2009 | Finland |      |     | 13 | - | - | + | - | + | - | - | - | - | - | - | - | - | IV        |  |         |
| 144 | E141.3    | Pig     | 2009 | Finland |      |     | 10 | - | + | + | - | - | - | - | - | - | - | - | - | - | II        |  |         |
| 145 | E144.3    | Pig     | 2009 | Finland |      |     | 15 | - | - | + | - | + | - | + | + | - | - | - | - | - | VII       |  |         |
| 147 | E149.3    | Pig     | 2009 | Finland |      |     | 14 | - | - | + | - | + | - | + | + | - | - | - | - | - | untypable |  |         |
| 148 | E150.1    | Pig     | 2009 | Finland | 7799 | 828 | 13 | - | - | + | - | + | - | - | - | - | - | - | - | - | IV        |  | 195.129 |

|     |        |     |      |         |      |     |    |   |   |   |   |   |   |   |   |   |   |   |   |   |           |               |         |
|-----|--------|-----|------|---------|------|-----|----|---|---|---|---|---|---|---|---|---|---|---|---|---|-----------|---------------|---------|
| 149 | E154.3 | Pig | 2009 | Finland | 1058 | 828 | 11 | - | - | - | - | - | - | - | - | - | - | - | - | + | X         | 195.130       |         |
| 150 | E160.3 | Pig | 2009 | Finland |      |     | 13 | - | - | + | - | + | - | - | - | + | - | - | - | - | -         | IV            |         |
| 151 | E163.2 | Pig | 2009 | Finland | 1096 | 828 | 10 | - | + | + | - | - | - | - | - | - | - | - | - | - | -         | II            | 195.126 |
| 152 | E175.9 | Pig | 2009 | Finland |      |     | 13 | - | - | + | - | + | - | - | - | + | - | - | - | - | -         | IV            |         |
| 153 | A28    | Pig | 2007 | Finland |      |     | 12 | - | - | - | - | - | - | - | - | - | - | - | - | + | X         | 6666666.94320 |         |
| 154 | A30    | Pig | 2007 | Finland |      |     | 7  | - | - | - | + | - | - | - | - | - | - | - | - | - | -         | III           |         |
| 155 | A31    | Pig | 2007 | Finland |      |     | 7  | - | - | - | + | - | - | - | - | - | - | - | - | - | -         | III           |         |
| 156 | A32    | Pig | 2007 | Finland |      |     | 7  | - | - | - | + | - | - | - | - | - | - | - | - | - | -         | III           |         |
| 157 | A40.1  | Pig | 2007 | Finland |      |     | 7  | - | - | - | + | - | - | - | - | - | - | - | - | - | -         | III           |         |
| 158 | A46    | Pig | 2007 | Finland |      |     | 7  | - | - | - | + | - | - | - | - | - | - | - | - | - | -         | III           |         |
| 159 | A50    | Pig | 2007 | Finland |      |     | 11 | - | - | - | - | - | - | - | - | - | - | - | - | + | X         |               |         |
| 160 | A53    | Pig | 2007 | Finland |      |     | 11 | - | - | - | - | - | - | - | - | - | - | - | - | + | X         |               |         |
| 161 | A56    | Pig | 2007 | Finland |      |     | 11 | - | - | - | - | - | - | - | - | - | - | - | - | + | untypable |               |         |
| 162 | A57    | Pig | 2007 | Finland |      |     | 13 | - | - | + | - | + | - | - | - | - | - | - | - | - | -         | VI            |         |
| 163 | A62    | Pig | 2007 | Finland |      |     | 11 | - | - | - | - | - | - | - | - | - | - | - | - | + | X         |               |         |
| 164 | A66    | Pig | 2007 | Finland |      |     | 11 | - | - | - | - | - | - | - | - | - | - | - | - | + | X         |               |         |
| 165 | A68    | Pig | 2007 | Finland |      |     | 11 | - | - | - | - | - | - | - | - | - | - | - | - | + | X         |               |         |
| 167 | A70.1  | Pig | 2007 | Finland |      |     | 10 | - | + | + | - | - | - | - | - | - | - | - | - | - | -         | II            |         |
| 168 | A71.1  | Pig | 2007 | Finland |      |     | 13 | - | - | + | - | + | - | - | - | - | - | - | - | - | -         | VI            |         |
| 169 | A74.1  | Pig | 2007 | Finland |      |     | 13 | - | - | + | - | + | - | - | - | - | - | - | - | - | -         | VI            |         |
| 170 | A78.1  | Pig | 2007 | Finland |      |     | 10 | - | + | + | - | - | - | - | - | - | - | - | - | - | -         | II            |         |
| 174 | A26.1  | Pig | 2007 | Finland | 6956 |     | 13 | - | - | + | - | + | - | - | - | - | - | - | - | - | -         | VI            | 195.109 |
| 175 | A30.1  | Pig | 2007 | Finland |      |     | 11 | - | - | - | - | - | - | - | - | - | - | - | - | + | X         |               |         |
| 176 | A32.1  | Pig | 2007 | Finland |      |     | 11 | - | - | - | - | - | - | - | - | - | - | - | - | + | X         |               |         |
| 177 | A35.1  | Pig | 2007 | Finland | 1143 |     | 13 | - | - | + | - | + | + | - | + | - | - | - | - | - | -         | IV            | 195.108 |
| 178 | A37.1  | Pig | 2007 | Finland |      |     | 11 | - | - | - | - | - | - | - | - | - | - | - | - | + | X         |               |         |
| 179 | C1.1   | Pig | 2008 | Finland |      |     | 7  | - | - | - | + | - | - | - | - | - | - | - | - | - | -         | III           |         |
| 183 | C23.1  | Pig | 2008 | Finland |      |     | 13 | - | - | + | - | + | - | - | - | + | - | - | - | - | -         | IV            |         |
| 184 | C25.1  | Pig | 2008 | Finland |      |     | 10 | - | + | + | - | - | - | - | - | - | - | - | - | - | -         | II            |         |
| 185 | C28.3  | Pig | 2008 | Finland |      |     | 7  | - | - | + | + | - | - | - | - | - | - | - | - | + | untypable |               |         |
| 186 | C29.1  | Pig | 2008 | Finland |      |     | 11 | - | - | - | - | - | - | - | - | - | - | - | - | + | X         |               |         |
| 188 | C34.2  | Pig | 2008 | Finland |      |     | 13 | - | - | + | - | + | - | - | - | - | - | - | - | - | -         | VI            |         |
| 189 | C35.1  | Pig | 2008 | Finland |      |     | 11 | - | - | - | - | - | - | - | - | - | - | - | - | + | X         |               |         |
| 190 | C37.1  | Pig | 2008 | Finland |      |     | 13 | - | - | + | - | + | - | - | - | + | - | - | - | - | -         | IV            |         |
| 191 | C39.1  | Pig | 2008 | Finland |      |     | 7  | - | - | - | + | - | - | - | - | - | - | - | - | - | -         | III           |         |
| 193 | C40.3  | Pig | 2008 | Finland |      |     | 13 | - | - | + | - | + | - | - | - | - | - | - | - | - | -         | VI            |         |
| 195 | C46.1  | Pig | 2008 | Finland |      |     | 7  | - | - | - | + | - | - | - | - | - | - | - | - | - | -         | III           |         |
| 196 | C48.1  | Pig | 2008 | Finland |      |     | 13 | - | - | + | - | + | - | - | - | + | - | - | - | - | -         | IV            |         |

Supplemental Table 2. Novel LOS class description

| orthologue                           | RAST ID            | product                                               | seq length (AA) |
|--------------------------------------|--------------------|-------------------------------------------------------|-----------------|
| <b><i>C. coli</i> (153) Class X</b>  |                    |                                                       |                 |
| 25                                   | fig 6666666.94320  | lipopolysaccharide heptosyltransferase I              | 342             |
| 12                                   | fig 6666666.94320  | lipid A biosynthesis lauroyl acyltransferase          | 295             |
| 16                                   | fig 6666666.94320  | lipooligosaccharide biosynthesis glycosyltransferase  | 516             |
| 1850                                 | fig 6666666.94320  | putative glycosyltransferase                          | 350             |
| 1668                                 | fig 6666666.94320  | putative lipopolysaccharide 1,3-galactosyltransferase | 399             |
| 8                                    | fig 6666666.94320  | hypothetical protein                                  | 364             |
| 1                                    | fig 6666666.94320  | hypothetical protein                                  | 406             |
| 2                                    | fig 6666666.94320  | hypothetical protein                                  | 319             |
| 3                                    | fig 6666666.94320  | UDP-N-acetylglucosamine 2-epimerase                   | 373             |
| 1821                                 | fig 6666666.94320  | hypothetical protein                                  | 147             |
| 1967                                 | fig 6666666.94320  | hypothetical protein                                  | 138             |
| 1742                                 | fig 6666666.94320  | hypothetical protein                                  | 340             |
| 1743                                 | fig 6666666.94320  | hypothetical protein                                  | 292             |
| 10                                   | fig 6666666.94320  | putative glucosyltransferase                          | 278             |
| 23                                   | fig 6666666.94320  | ADP-heptose--LPS heptosyltransferase II               | 321             |
| <b><i>C. coli</i> (138) Class XI</b> |                    |                                                       |                 |
| 25                                   | fig 195.111.peg.26 | lipopolysaccharide heptosyltransferase I              | 342             |
| 12                                   | fig 195.111.peg.26 | lipid A biosynthesis lauroyl acyltransferase          | 295             |
| 16                                   | fig 195.111.peg.26 | lipooligosaccharide biosynthesis glycosyltransferase  | 516             |
| 1850                                 | fig 195.111.peg.26 | putative glycosyltransferase                          | 350             |
| 1668                                 | fig 195.111.peg.26 | putative lipopolysaccharide 1,3-galactosyltransferase | 399             |
| 8                                    | fig 195.111.peg.25 | hypothetical protein                                  | 364             |
| 1                                    | fig 195.111.peg.25 | hypothetical protein                                  | 406             |
| 2                                    | fig 195.111.peg.25 | hypothetical protein                                  | 319             |
| 3                                    | fig 195.111.peg.25 | hypothetical protein                                  | 373             |
| 1821                                 | fig 195.111.peg.25 | hypothetical protein                                  | 147             |
| 1920                                 | fig 195.111.peg.25 | hypothetical protein                                  | 131             |
| 1742                                 | fig 195.111.peg.25 | hypothetical protein                                  | 340             |
| 1743                                 | fig 195.111.peg.25 | hypothetical protein                                  | 292             |
| 10                                   | fig 195.111.peg.25 | putative glucosyltransferase                          | 278             |
| 23                                   | fig 195.111.peg.25 | ADP-heptose--LPS heptosyltransferase II               | 321             |
| <b><i>C. coli</i> (99) class XII</b> |                    |                                                       |                 |
| 25                                   | fig 195.104.peg.15 | lipopolysaccharide heptosyltransferase I              | 342             |
| 12                                   | fig 195.104.peg.15 | lipid A biosynthesis lauroyl acyltransferase          | 295             |
| 16                                   | fig 195.104.peg.15 | lipooligosaccharide biosynthesis glycosyltransferase  | 516             |
| 1850                                 | fig 195.104.peg.15 | putative glycosyltransferase                          | 350             |
| 8                                    | fig 195.104.peg.15 | hypothetical protein                                  | 364             |
| 1790                                 | fig 195.104.peg.15 | hypothetical protein                                  | 355             |
| 4                                    | fig 195.104.peg.15 | methyltransferase type 12                             | 216             |
| 5                                    | fig 195.104.peg.15 | hypothetical protein                                  | 211             |
| 7                                    | fig 195.104.peg.15 | phosphoserine phosphatase                             | 199             |
| 2965                                 | fig 195.104.peg.15 | hypothetical protein                                  | 333             |
| 1821                                 | fig 195.104.peg.15 | hypothetical protein                                  | 147             |
| 1920                                 | fig 195.104.peg.15 | hypothetical protein                                  | 131             |
| 1742                                 | fig 195.104.peg.15 | hypothetical protein                                  | 340             |
| 1743                                 | fig 195.104.peg.15 | hypothetical protein                                  | 292             |
| 10                                   | fig 195.104.peg.15 | putative glucosyltransferase                          | 278             |
| 23                                   | fig 195.104.peg.15 | ADP-heptose--LPS heptosyltransferase II               | 321             |

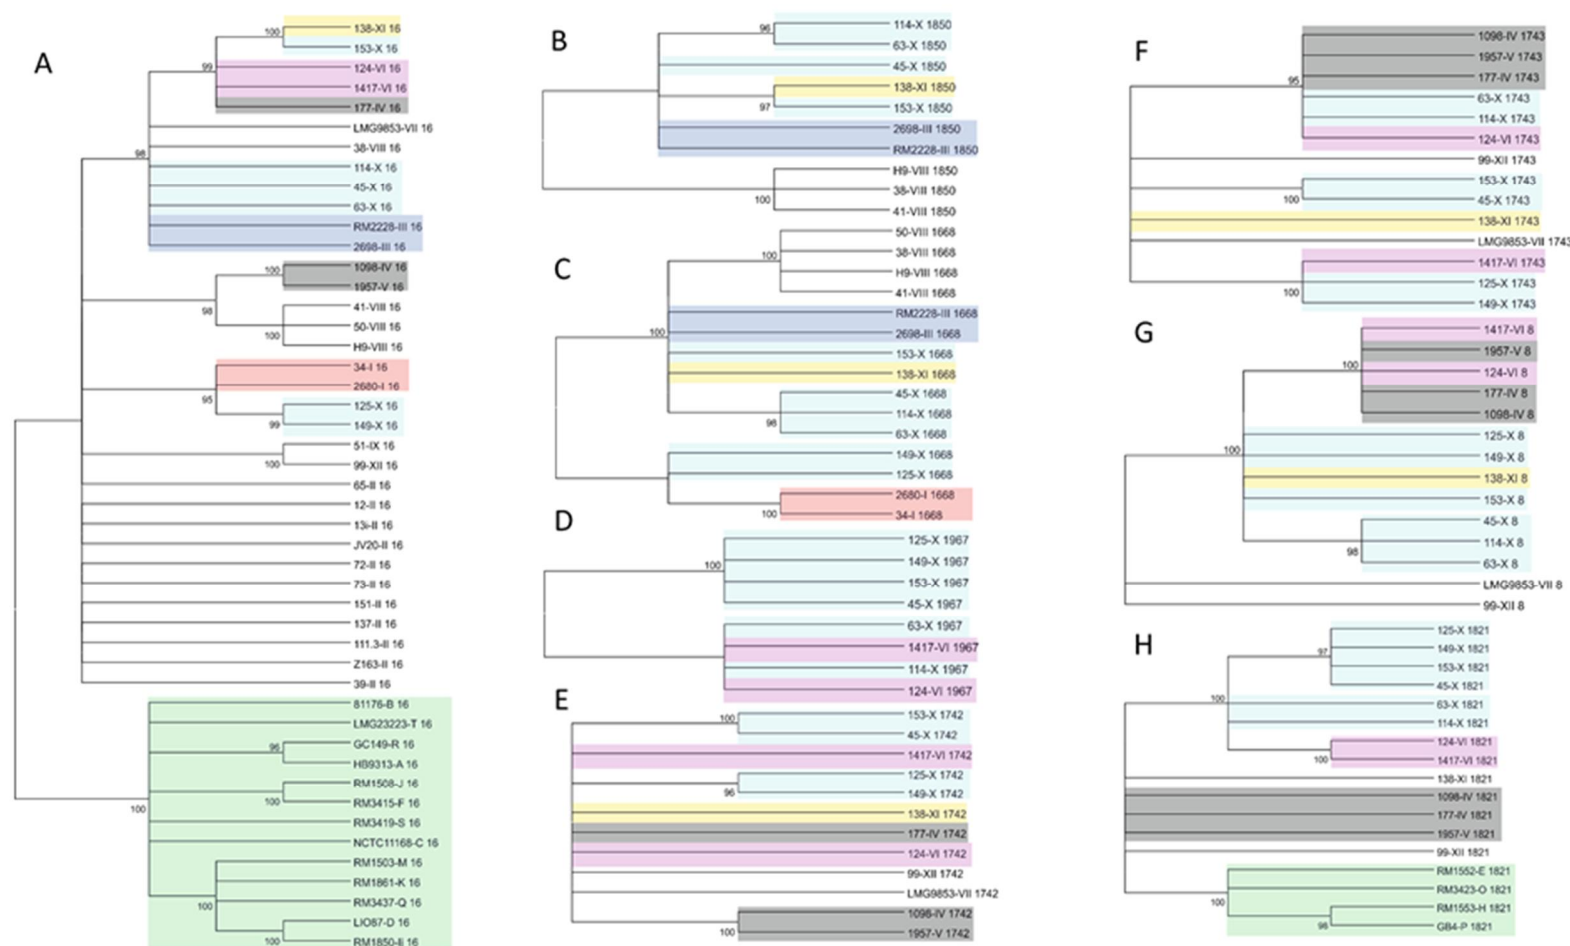

**Supplemental Figure 1.** Consensus cladogram representing the evolutionary relationship among orthologues belonging to GO A: 16, B: 1850, C: 1668, D: 1967, E: 1742, F: 1743 (nomenclature from Richard *et al.* 23). *C. jejuni* strains are highlighted in green. *C. coli* LOS locus class X strains are highlighted in cyan, class XI in yellow, class I in red, class III in blue, class IV/V in grey, and class VI in pink. The 95% bootstrap consensus tree was built from 100 replicates. Strains LOS locus class is indicated after the strain's ID.

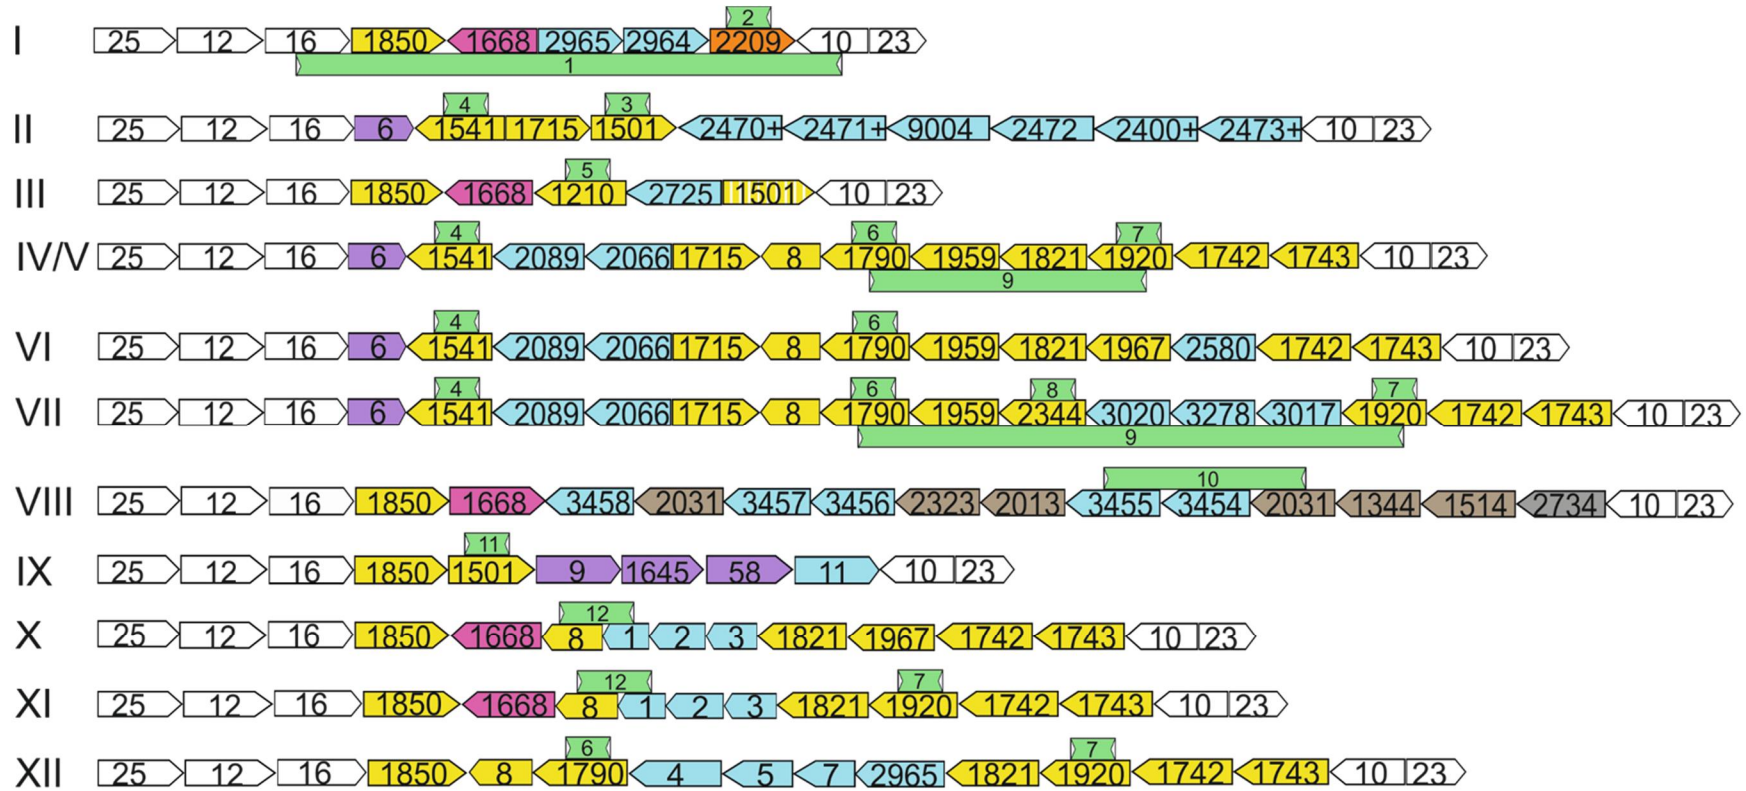

**Supplemental Figure 2.** Yellow arrows: orthologues present in the LOS of *C. jejuni* and *C. coli*. Purple arrows: orthologues present in *C. coli* LOS, *C. coli* CPS, *C. jejuni* subsp. *jejuni* LOS, and *C. jejuni* subsp. *jejuni* CPS. Pink arrows: orthologues present in *C. coli* LOS, *C. jejuni* LOS, and *C. jejuni* CPS. Brown arrows: orthologues present in *C. coli* LOS and CPS and the CPS of *C. jejuni*. Blue arrows: orthologues only present in *C. coli* LOS. Grey arrows: orthologues present in *C. coli* LOS and CPS. Orange arrows: orthologues present in the LOS of *C. coli* and the CPS of *C. jejuni* subsp. *jejuni*. Stripped orthologues were fragmented. Orthologues marked with a plus sign were identified as truncated pseudogenes (discussed in text). For reference, orthologue 25 corresponds to *waaC* and orthologue 23 is *waaF*. PCR products are shown in green. For simplification, PCR 1 is only shown on LOS class I.

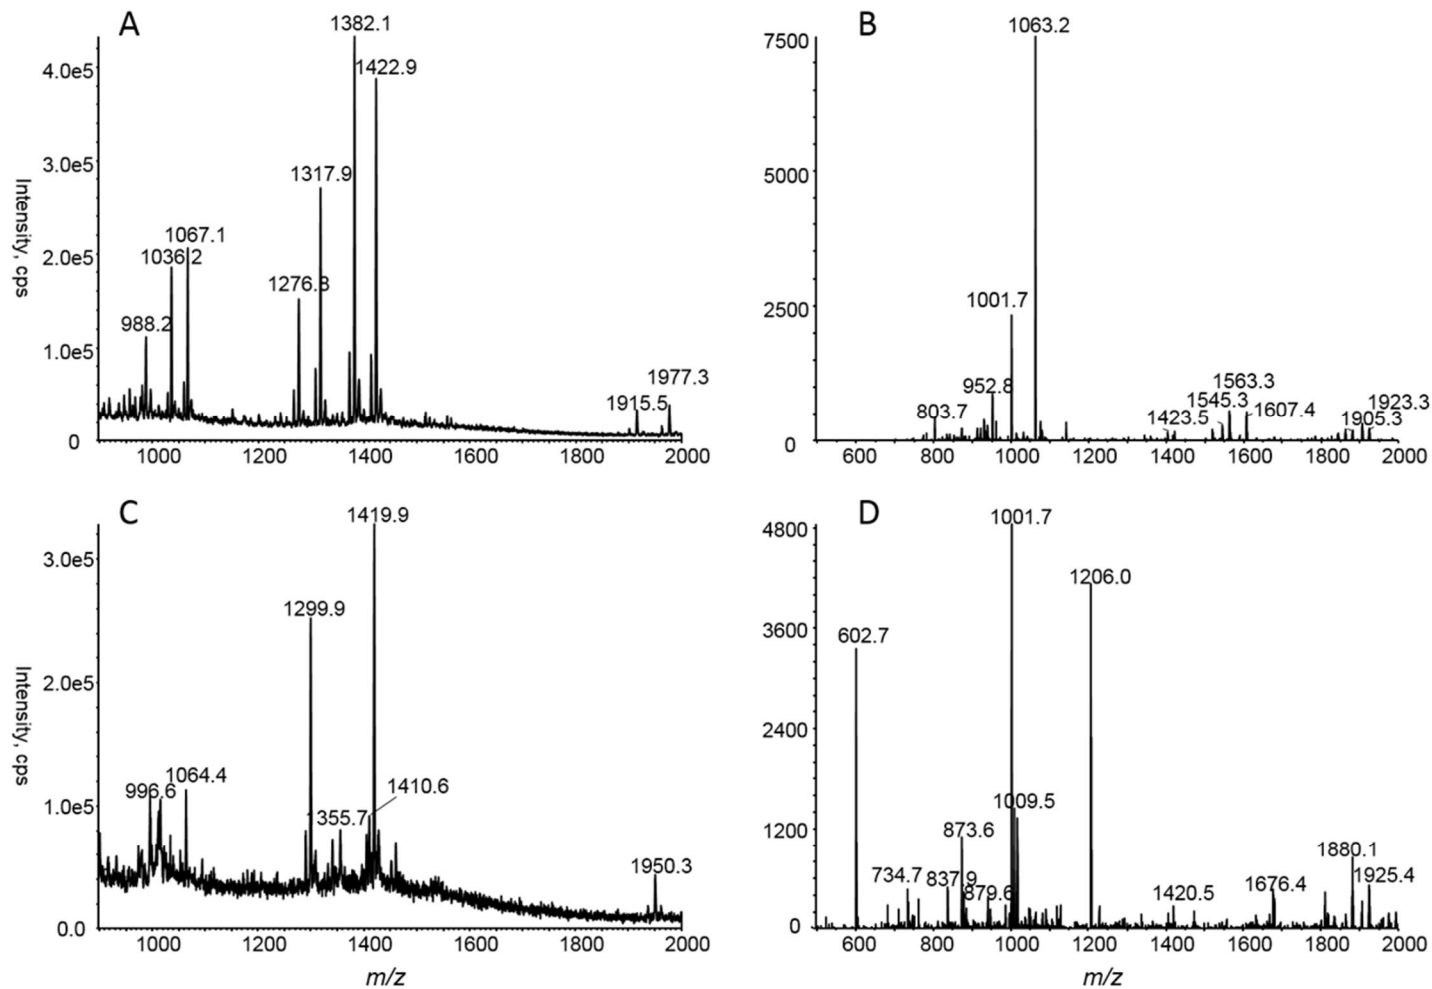

**Supplemental Figure 3.** Example of the electrophoresis-assisted open-tubular liquid chromatography electrospray mass spectrometry (EA-OTLC-MS) analysis of the intact LOS from *C. coli*. (A) extracted mass spectrum from strain #137; (B) extracted MS/MS spectrum from precursor ion at  $m/z$  1422.9; © extracted mass spectrum from strain #65; (D) extracted MS/MS spectrum for precursor ion at  $m/z$  1299.9.
